# Supplementary material
Source: HighWire-hosted journal article supplement (http://ajnr-stage2.highwire.org/highwire/filestream/52867/field_highwire_adjunct_files/0/16-00820.pdf)
Supplement: 16-00820.pdf [file 16-00820.pdf]

**On-line Table: Correlation of codeletion of 1p/19q with MR imaging features**

|                             | Total<br>(N = 148) | WHO 2016                                         |                                                | P Value             |
|-----------------------------|--------------------|--------------------------------------------------|------------------------------------------------|---------------------|
|                             |                    | Oligodendroglioma (1p/19q<br>codeleted) (n = 90) | Astrocytoma (non-1p/19q<br>codeleted) (n = 58) |                     |
| Location (predominant)      |                    |                                                  |                                                | .02 <sup>a</sup>    |
| Cerebellar                  | 1 (0.7%)           | 0 (0%)                                           | 1 (1.7%)                                       |                     |
| Deep gray                   | 1 (0.7%)           | 0 (0%)                                           | 1 (1.7%)                                       |                     |
| Frontal                     | 101 (68.2%)        | 66 (73.3%)                                       | 35 (60.3%)                                     |                     |
| Insular                     | 11 (7.4%)          | 4 (4.4%)                                         | 7 (12.1%)                                      |                     |
| Parietal                    | 20 (13.5%)         | 15 (16.7%)                                       | 5 (8.6%)                                       |                     |
| Temporal                    | 14 (9.5%)          | 5 (5.6%)                                         | 9 (15.5%)                                      |                     |
| Circumscribed (partial/yes) | 39 (26.4%)         | 7 (7.8%)                                         | 32 (55.2%)                                     | <.0001 <sup>a</sup> |
| Sharp T1 border             | 26 (17.6%)         | 3 (3.3%)                                         | 23 (39.7%)                                     | <.0001 <sup>a</sup> |
| Sharp T2 border             | 25 (16.9%)         | 3 (3.3%)                                         | 22 (37.9%)                                     | <.0001 <sup>a</sup> |
| Smooth contour on T2        | 21 (14.2%)         | 4 (4.4%)                                         | 17 (29.3%)                                     | <.0001 <sup>a</sup> |
| Homogeneous on T1           | 9 (6.1%)           | 1 (1.1%)                                         | 8 (13.8%)                                      | .003 <sup>a</sup>   |
| Homogeneous on T2           | 7 (4.7%)           | 1 (1.1%)                                         | 6 (10.3%)                                      | .01 <sup>a</sup>    |
| Paramagnetic susceptibility | 27/147 (18.4%)     | 17/89 (19.1%)                                    | 10/58 (17.2%)                                  | .83 <sup>a</sup>    |
| Necrosis or cystic change   | 77 (52.0%)         | 50 (55.6%)                                       | 27 (46.6%)                                     | .31 <sup>a</sup>    |
| Contrast-enhancement        | 50/146 (34.3%)     | 30/88 (34.1%)                                    | 20/58 (34.5%)                                  | 1.0 <sup>a</sup>    |
| Cross midline or bilateral  | 28 (18.9%)         | 16 (17.8%)                                       | 12 (20.7%)                                     | .67 <sup>a</sup>    |
| Overall mean of ADC         |                    |                                                  |                                                | .0005 <sup>b</sup>  |
| No.                         | 65                 | 38                                               | 27                                             |                     |
| Median (IQR)                | 1.4 (1.2–1.5)      | 1.3 (1.2–1.4)                                    | 1.5 (1.4–1.8)                                  |                     |
| Minimum ADC                 |                    |                                                  |                                                | .004 <sup>b</sup>   |
| No.                         | 65                 | 38                                               | 27                                             |                     |
| Median (IQR)                | 1.2 (1.1–1.3)      | 1.2 (1.0–1.2)                                    | 1.4 (1.1–1.7)                                  |                     |
| Maximum ADC                 |                    |                                                  |                                                | .0008 <sup>b</sup>  |
| No.                         | 65                 | 38                                               | 27                                             |                     |
| Median (IQR)                | 1.7 (1.4–1.9)      | 1.6 (1.3–1.8)                                    | 1.9 (1.6–2.2)                                  |                     |

**Note:**—IQR indicates interquartile range; max, maximum; min, minimum.

<sup>a</sup> Fisher exact test.

<sup>b</sup> Kruskal-Wallis test.
